# Supplementary material
Source: PubMed Central journal article supplement (PMC8330959)

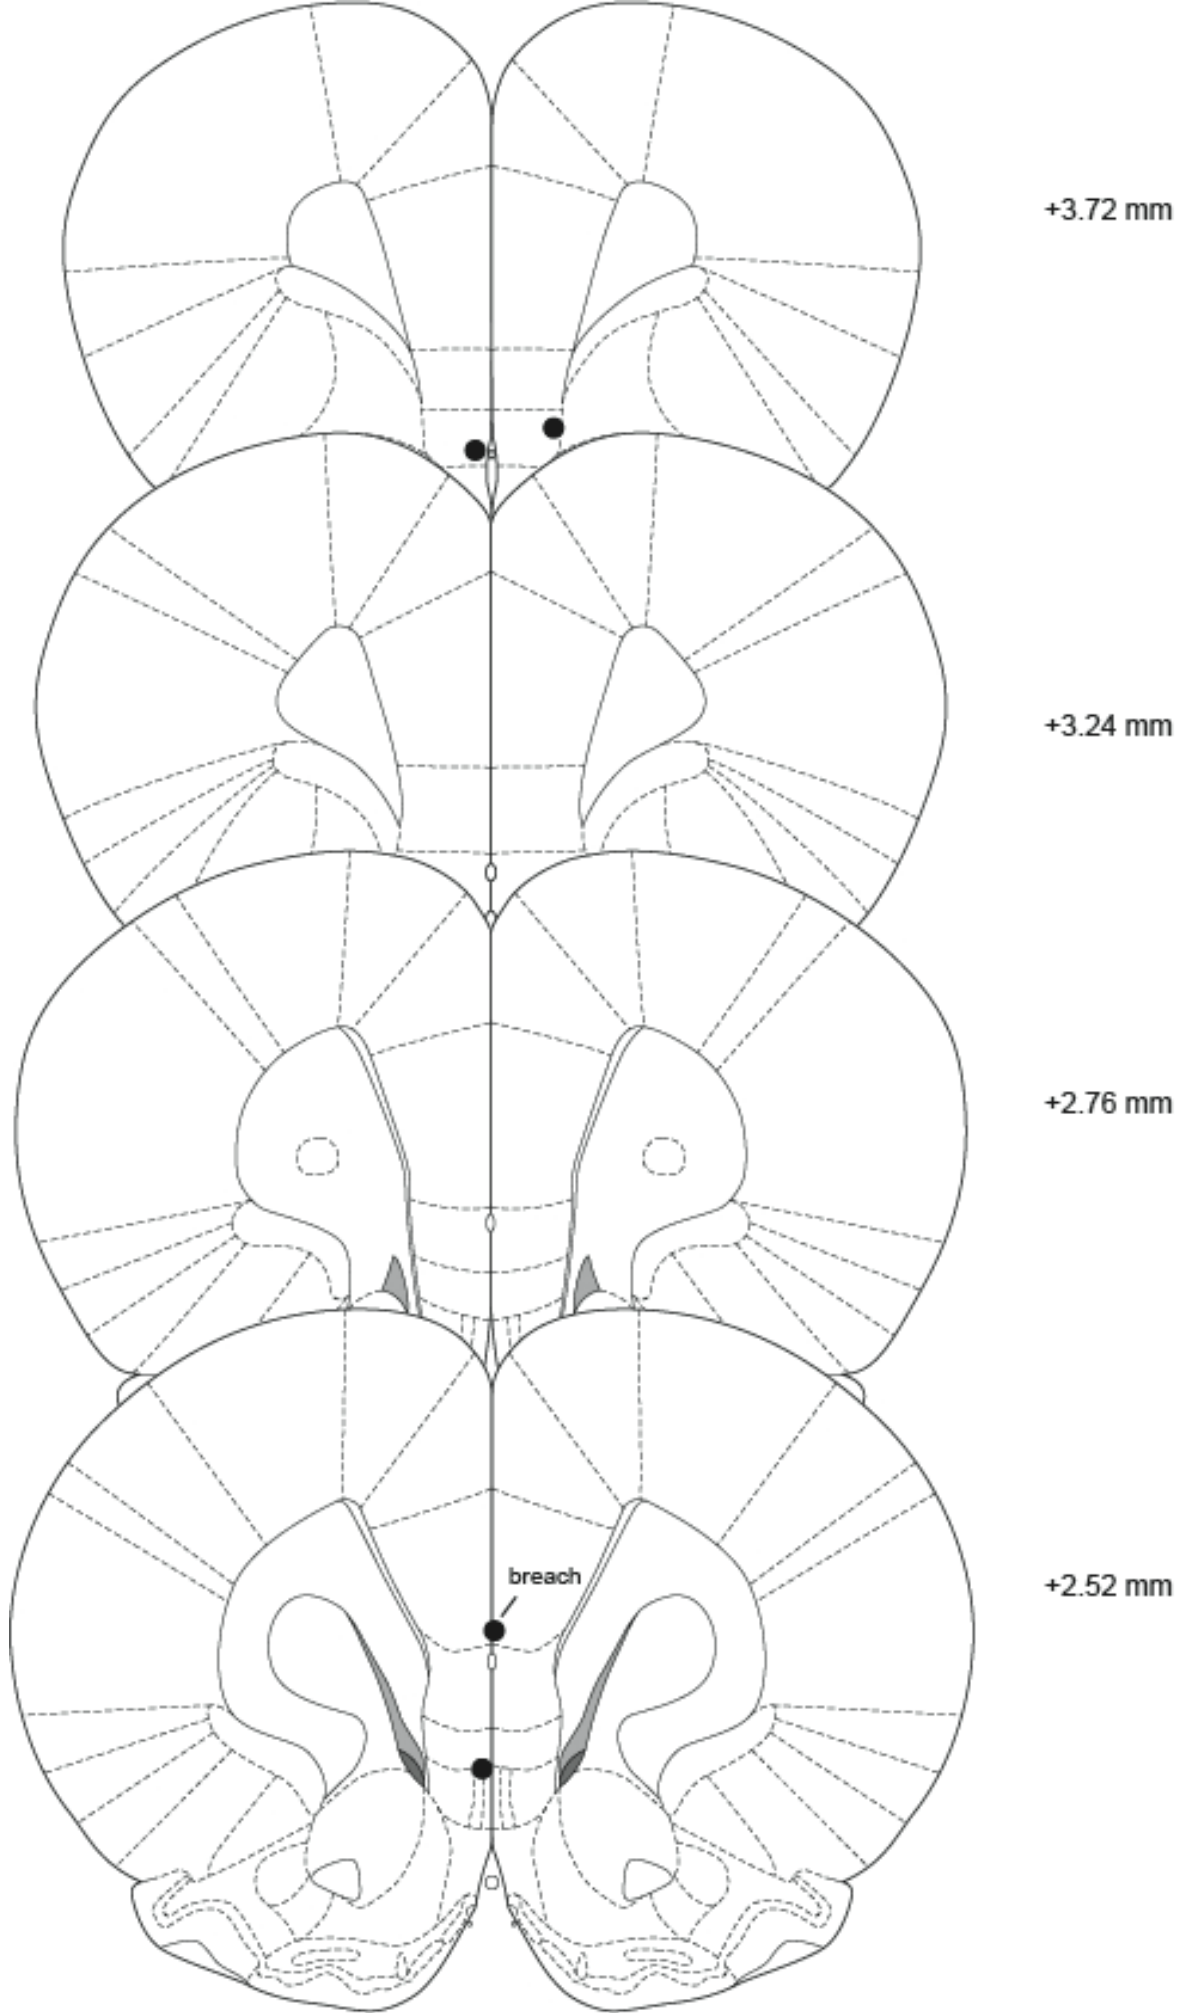

● Missed Placements

Supplement: NIHMS1504190-supplement-2.pdf [file NIHMS1504190-supplement-2.pdf]
